# Supplementary material for: Lifestyle Risk Factors for Overweight/Obesity in Spanish Children
Source: MDPI journal article supplement (doi:10.3390/children9121947), 2022-12-12
Supplement: s1 [file s1]

|  |  |
|--|--|
|  |  |
|--|--|

|  |  |  |
|--|--|--|
|  |  |  |
|--|--|--|

|  |  |  |  |  |
|--|--|--|--|--|
|  |  |  |  |  |
|--|--|--|--|--|

## Cuestionario de Frecuencia de alimentos para Niños Pequeños

### Información acerca de su hijo/a

Nos gustaría que nos describiese los hábitos de consumo de líquidos de su hijo en los últimos 1-2 meses.

Por lo tanto, es importante que éste cuestionario sea completado por la que persona que pasa más tiempo con el niño (a parte del tiempo en el colegio). Éste debe incluir todas las bebidas consumidas durante éste período. Debe incluir, así mismo, cualquier bebida que su hijo consuma fuera de casa, incluyendo la guardería, los restaurantes

**Ejemplo:** Si tu hijo/a toma tres tazas de chocolate con leche por semana, la respuesta debería ser:

| Grupos de alimentos                                     | ¿Con qué frecuencia consume su hijo los siguientes productos?                                                                                                                                                                                                                          | Y ¿cuáles es la cantidad media por día?                                                                                                                                                                                                                                                                                                                                                                                                                                                            | Ejemplo de tamaño de porciones                                                                                                                                               | Elija la opción más frecuente |
|---------------------------------------------------------|----------------------------------------------------------------------------------------------------------------------------------------------------------------------------------------------------------------------------------------------------------------------------------------|----------------------------------------------------------------------------------------------------------------------------------------------------------------------------------------------------------------------------------------------------------------------------------------------------------------------------------------------------------------------------------------------------------------------------------------------------------------------------------------------------|------------------------------------------------------------------------------------------------------------------------------------------------------------------------------|-------------------------------|
| Leche azúcarada o chocolateada<br>(Asturiana, cola cao) | <input type="radio"/> nunca o menos de una vez al mes<br><input type="radio"/> 1-3 días por mes<br><input type="radio"/> 1 día por semana<br><input checked="" type="radio"/> 2-4 días por semana<br><input type="radio"/> 5-6 días por semana<br><input type="radio"/> todos los días | <input type="radio"/> 100 ml o menos<br><input type="radio"/> entre 100 y 200 ml<br><input checked="" type="radio"/> entre 200 y 300 ml<br><input type="radio"/> entre 300 y 400 ml<br><input type="radio"/> entre 400 y 500 ml<br><input type="radio"/> entre 500 y 600 ml<br><input type="radio"/> entre 600 y 700 ml<br><input type="radio"/> entre 700 y 800 ml<br><input type="radio"/> entre 800 y 900 ml<br><input type="radio"/> entre 900 y 1000ml<br><input type="radio"/> 1000 ml o más | 1 taza = 225 ml<br>1 lata= 200ml<br>1 botella pequeña de plástico= 300ml<br>1 botella grande de plástico= 500ml<br><br>Para tamaños de vaso, taza y cartón mire el apéndice. |                               |

| Grupos de alimentos                                                         | ¿Con qué frecuencia consume su hijo los siguientes productos?                                                                                                                                                                         | Y ¿cuál es la cantidad media por día?                                                                                                                                                                                                                                                                                                                                      | Ejemplo de tamaño de porciones                                                                                                                                                   | Elija la opción más frecuente |
|-----------------------------------------------------------------------------|---------------------------------------------------------------------------------------------------------------------------------------------------------------------------------------------------------------------------------------|----------------------------------------------------------------------------------------------------------------------------------------------------------------------------------------------------------------------------------------------------------------------------------------------------------------------------------------------------------------------------|----------------------------------------------------------------------------------------------------------------------------------------------------------------------------------|-------------------------------|
| Agua natural                                                                | <ul style="list-style-type: none"> <li>○ nunca o menos de una vez al mes</li> <li>○ 1-3 días al mes</li> <li>○ 1 día a la semana</li> <li>○ 2-4 días a la semana</li> <li>○ 5-6 días a la semana</li> <li>○ todos los días</li> </ul> | <ul style="list-style-type: none"> <li>○ 100 ml o menos</li> <li>○ entre 100 y 200 ml</li> <li>○ entre 200 y 300 ml</li> <li>○ entre 300 y 400 ml</li> <li>○ entre 400 y 500 ml</li> <li>○ entre 500 y 600 ml</li> <li>○ entre 600 y 700 ml</li> <li>○ entre 700 y 800 ml</li> <li>○ entre 800 y 900 ml</li> <li>○ entre 900 y 1000 ml</li> <li>○ 1000 ml o más</li> </ul> | <p><i>1 taza = 225 ml</i><br/> <i>1 botella pequeña de plástico= 500ml</i></p> <p><i>Para tamaños de vasos y tazas, por favor, vea el apéndice</i></p>                           |                               |
| Bebidas azúcaradas<br><i>(Coca Cola, Pepsi, Fanta, Sprite, Nestea)</i>      | <ul style="list-style-type: none"> <li>○ nunca o menos de una vez al mes</li> <li>○ 1-3 días al mes</li> <li>○ 1 día a la semana</li> <li>○ 2-4 días a la semana</li> <li>○ 5-6 días a la semana</li> <li>○ todos los días</li> </ul> | <ul style="list-style-type: none"> <li>○ 100 ml o menos</li> <li>○ entre 100 y 200 ml</li> <li>○ entre 200 y 300 ml</li> <li>○ entre 300 y 400 ml</li> <li>○ entre 400 y 500 ml</li> <li>○ entre 500 y 600 ml</li> <li>○ entre 600 y 700 ml</li> <li>○ entre 700 y 800 ml</li> <li>○ entre 800 y 900 ml</li> <li>○ entre 900 y 1000 ml</li> <li>○ 1000 ml o más</li> </ul> | <p><i>1 taza = 225 ml</i><br/> <i>1 lata= 330ml</i><br/> <i>1 botella pequeña de plástico= 500ml</i></p> <p><i>Para tamaños de vasos y tazas, por favor, vea el apéndice</i></p> |                               |
| Bebidas light<br><i>(Cola light, Coca cola zero, Pepsi max, Fanta zero)</i> | <ul style="list-style-type: none"> <li>○ nunca o menos de una vez al mes</li> <li>○ 1-3 días al mes</li> <li>○ 1 día a la semana</li> <li>○ 2-4 días a la semana</li> <li>○ 5-6 días a la semana</li> <li>○ todos los días</li> </ul> | <ul style="list-style-type: none"> <li>○ 100 ml o menos</li> <li>○ entre 100 y 200 ml</li> <li>○ entre 200 y 300 ml</li> <li>○ entre 300 y 400 ml</li> <li>○ entre 400 y 500 ml</li> <li>○ entre 500 y 600 ml</li> <li>○ entre 600 y 700 ml</li> <li>○ entre 700 y 800 ml</li> <li>○ entre 800 y 900 ml</li> <li>○ entre 900 y 1000 ml</li> <li>○ 1000 ml o más</li> </ul> | <p><i>1 taza = 225 ml</i><br/> <i>1 lata= 330ml</i><br/> <i>1 botella = 500ml</i></p> <p><i>Para tamaños de vasos y tazas, por favor, vea el apéndice</i></p>                    |                               |

| | | | | | | | | | | |

| Grupos de alimentos                                                                                | ¿Con qué frecuencia consume su hijo los siguientes productos?                                                                                                                                                                         | Y ¿cuál es la cantidad media por día?                                                                                                                                                                                                                                                                                                                                      | Ejemplo de tamaño de porciones                                                                                                                                                      | Elija la opción más frecuente                                                        |
|----------------------------------------------------------------------------------------------------|---------------------------------------------------------------------------------------------------------------------------------------------------------------------------------------------------------------------------------------|----------------------------------------------------------------------------------------------------------------------------------------------------------------------------------------------------------------------------------------------------------------------------------------------------------------------------------------------------------------------------|-------------------------------------------------------------------------------------------------------------------------------------------------------------------------------------|--------------------------------------------------------------------------------------|
| Zumo de frutas natural recién exprimido                                                            | <ul style="list-style-type: none"> <li>o nunca o menos de una vez al mes</li> <li>o 1-3 días al mes</li> <li>o 1 día a la semana</li> <li>o 2-4 días a la semana</li> <li>o 5-6 días a la semana</li> <li>o todos los días</li> </ul> | <ul style="list-style-type: none"> <li>o 100 ml o menos</li> <li>o entre 100 y 200 ml</li> <li>o entre 200 y 300 ml</li> <li>o entre 300 y 400 ml</li> <li>o entre 400 y 500 ml</li> <li>o entre 500 y 600 ml</li> <li>o entre 600 y 700 ml</li> <li>o entre 700 y 800 ml</li> <li>o entre 800 y 900 ml</li> <li>o entre 900 y 1000 ml</li> <li>o 1000 ml o más</li> </ul> | <p><i>1 taza= 225 ml</i></p> <p><i>Para tamaños de vasos y tazas, por favor, vea el apéndice</i></p>                                                                                |                                                                                      |
| Zumo de fruta industrial de brick/embotellado.<br>(Don Simon, Juver/Disfruta, marcas blancas, etc) | <ul style="list-style-type: none"> <li>o nunca o menos de una vez al mes</li> <li>o 1-3 días al mes</li> <li>o 1 día a la semana</li> <li>o 2-4 días a la semana</li> <li>o 5-6 días a la semana</li> <li>o todos los días</li> </ul> | <ul style="list-style-type: none"> <li>o 100 ml o menos</li> <li>o entre 100 y 200 ml</li> <li>o entre 200 y 300 ml</li> <li>o entre 300 y 400 ml</li> <li>o entre 400 y 500 ml</li> <li>o entre 500 y 600 ml</li> <li>o entre 600 y 700 ml</li> <li>o entre 700 y 800 ml</li> <li>o entre 800 y 900 ml</li> <li>o entre 900 y 1000 ml</li> <li>o 1000 ml o más</li> </ul> | <p><i>1 taza = 225 ml</i></p> <p><i>1 botella pequeña de plástico= 500ml</i></p> <p><i>1 carton= 1l</i></p> <p><i>Para tamaños de vasos y tazas, por favor, vea el apéndice</i></p> |                                                                                      |
| Té<br><br>(infusión, té negro, té verde, manzanilla, etc)                                          | <ul style="list-style-type: none"> <li>o nunca o menos de una vez al mes</li> <li>o 1-3 días al mes</li> <li>o 1 día a la semana</li> <li>o 2-4 días a la semana</li> <li>o 5-6 días a la semana</li> <li>o todos los días</li> </ul> | <ul style="list-style-type: none"> <li>o 100 ml o menos</li> <li>o entre 100 y 200 ml</li> <li>o entre 200 y 300 ml</li> <li>o entre 300 y 400 ml</li> <li>o entre 400 y 500 ml</li> <li>o entre 500 y 600 ml</li> <li>o entre 600 y 700 ml</li> <li>o entre 700 y 800 ml</li> <li>o entre 800 y 900 ml</li> <li>o entre 900 y 1000 ml</li> <li>o 1000 ml o más</li> </ul> | <p><i>1 taza = 225 ml</i></p> <p><i>Para tamaños de vasos y tazas, por favor, vea el apéndice</i></p>                                                                               | <ul style="list-style-type: none"> <li>o con azúcar</li> <li>o sin azúcar</li> </ul> |

[illegible]

| Grupos de alimentos                                                                       | ¿Con qué frecuencia consume su hijo los siguientes productos?                                                                                                                                                                         | Y ¿cuál es la cantidad media por día?                                                                                                                                                                                                                                                                                                                                      | Ejemplo de tamaño de porciones                                                                                                                                                             | Elija la opción más frecuente                                                                                                                                                                  |
|-------------------------------------------------------------------------------------------|---------------------------------------------------------------------------------------------------------------------------------------------------------------------------------------------------------------------------------------|----------------------------------------------------------------------------------------------------------------------------------------------------------------------------------------------------------------------------------------------------------------------------------------------------------------------------------------------------------------------------|--------------------------------------------------------------------------------------------------------------------------------------------------------------------------------------------|------------------------------------------------------------------------------------------------------------------------------------------------------------------------------------------------|
| Batidos (todos los tipos)<br><br>(Solo Fruta (Hero), FruitSimply (Sunnydelight)), etc     | <ul style="list-style-type: none"> <li>o nunca o menos de una vez al mes</li> <li>o 1-3 días al mes</li> <li>o 1 día a la semana</li> <li>o 2-4 días a la semana</li> <li>o 5-6 días a la semana</li> <li>o todos los días</li> </ul> | <ul style="list-style-type: none"> <li>o 100 ml o menos</li> <li>o entre 100 y 200 ml</li> <li>o entre 200 y 300 ml</li> <li>o entre 300 y 400 ml</li> <li>o entre 400 y 500 ml</li> <li>o entre 500 y 600 ml</li> <li>o entre 600 y 700 ml</li> <li>o entre 700 y 800 ml</li> <li>o entre 800 y 900 ml</li> <li>o entre 900 y 1000 ml</li> <li>o 1000 ml o más</li> </ul> | <p>1 taza = 225 ml<br/>1 lata= 330ml<br/>1 carton=<br/>1 botella de plástico pequeña= 500ml</p> <p>Para tamaños de vasos y tazas, por favor, vea el apéndice</p>                           |                                                                                                                                                                                                |
| Leche                                                                                     | <ul style="list-style-type: none"> <li>o nunca o menos de una vez al mes</li> <li>o 1-3 días al mes</li> <li>o 1 día a la semana</li> <li>o 2-4 días a la semana</li> <li>o 5-6 días a la semana</li> <li>o todos los días</li> </ul> | <ul style="list-style-type: none"> <li>o 100 ml o menos</li> <li>o entre 100 y 200 ml</li> <li>o entre 200 y 300 ml</li> <li>o entre 300 y 400 ml</li> <li>o entre 400 y 500 ml</li> <li>o entre 500 y 600 ml</li> <li>o entre 600 y 700 ml</li> <li>o entre 700 y 800 ml</li> <li>o entre 800 y 900 ml</li> <li>o entre 900 y 1000 ml</li> <li>o 1000 ml o más</li> </ul> | <p>1 taza = 225 ml<br/>1 botella de plástico pequeña= 500ml</p> <p>Para tamaños de vasos y tazas, por favor, vea el apéndice</p>                                                           | <ul style="list-style-type: none"> <li>o Leche entera</li> <li>o Semidesnatada</li> <li>o Desnatada</li> <li>o Fortificada/enriquecida (por ejemplo, con calcio, hierro, vitaminas)</li> </ul> |
| Leche chocolateada o azucarada<br><br>(Puleva, Central Lechera Asturiana, marcas blancas) | <ul style="list-style-type: none"> <li>o nunca o menos de una vez al mes</li> <li>o 1-3 días al mes</li> <li>o 1 día a la semana</li> <li>o 2-4 días a la semana</li> <li>o 5-6 días a la semana</li> <li>o todos los días</li> </ul> | <ul style="list-style-type: none"> <li>o 100 ml o menos</li> <li>o entre 100 y 200 ml</li> <li>o entre 200 y 300 ml</li> <li>o entre 300 y 400 ml</li> <li>o entre 400 y 500 ml</li> <li>o entre 500 y 600 ml</li> <li>o entre 600 y 700 ml</li> <li>o entre 700 y 800 ml</li> <li>o entre 800 y 900 ml</li> <li>o entre 900 y 1000 ml</li> <li>o 1000 ml o más</li> </ul> | <p>1 taza = 225 ml<br/>1 lata= 200ml<br/>1 botella pequeña de plástico= 300ml<br/>1 botella grande de plástico= 500ml</p> <p>Para tamaños de vasos y tazas, por favor, vea el apéndice</p> |                                                                                                                                                                                                |

| Grupos de alimentos                                                                                                                                                                                      | ¿Con qué frecuencia consume su hijo los siguientes productos?                                                                                                                                                                                                                 | Y ¿cuál es la cantidad media por día?                                                                             | Ejemplo de tamaño de porciones                                                                         | Elija la opción más frecuente                                                                                                                                                                                                                                                                    |
|----------------------------------------------------------------------------------------------------------------------------------------------------------------------------------------------------------|-------------------------------------------------------------------------------------------------------------------------------------------------------------------------------------------------------------------------------------------------------------------------------|-------------------------------------------------------------------------------------------------------------------|--------------------------------------------------------------------------------------------------------|--------------------------------------------------------------------------------------------------------------------------------------------------------------------------------------------------------------------------------------------------------------------------------------------------|
| Yogurt natural<br>(sin azúcar añadido, yogur con edulcorante artificial)<br><br>(Danone, Danonino, Petit-suisse, marcas blancas)                                                                         | <input type="radio"/> nunca o menos de una vez al mes<br><input type="radio"/> 1-3 días al mes<br><input type="radio"/> 1 día a la semana<br><input type="radio"/> 2-4 días a la semana<br><input type="radio"/> 5-6 días a la semana<br><input type="radio"/> todos los días | <input type="radio"/> 65 g o menos<br><input type="radio"/> entre 65 y 195 g<br><input type="radio"/> 195 g o más | 1 taza=125 mg<br>1 petit-suisse= 50 g<br><br>Para tamaños de vasos y tazas, por favor, vea el apéndice | <input type="radio"/> Yogurt griego<br><input type="radio"/> Entero<br><input type="radio"/> Semidesnatado<br><input type="radio"/> Desnatado<br><input type="radio"/> Fortificado/enriquecido (por ejemplo, con vitaminas calcio, hierro, vitaminas)<br><input type="radio"/> Yogurt para niños |
| Yogurt de frutas aromatizado o azucarado<br>(yogurt de frutas, yogurt con azúcar añadido por el consumidor...)<br>Leches fermentadas tipo Actimel...<br>(Danone, Danonino, Petit-suisse, marcas blancas) | <input type="radio"/> nunca o menos de una vez al mes<br><input type="radio"/> 1-3 días al mes<br><input type="radio"/> 1 día a la semana<br><input type="radio"/> 2-4 días a la semana<br><input type="radio"/> 5-6 días a la semana<br><input type="radio"/> todos los días | <input type="radio"/> 65 g o menos<br><input type="radio"/> entre 65 y 195 g<br><input type="radio"/> 195 g o más | 1 taza=125 mg<br>1 petit-suisse= 50 g<br><br>Para tamaños de vasos y tazas, por favor, vea el apéndice | <input type="radio"/> Entera<br><input type="radio"/> Semidesnatada<br><input type="radio"/> Desnatada<br><input type="radio"/> Fortificada/ enriquecida (por ejemplo, con vitaminas, calcio, hierro)<br><input type="radio"/> Yogurt para niños                                                 |

¡Muchas gracias por haber contestado a estas preguntas!

Por favor, compruebe que no se ha dejado ninguna pregunta por responder.

Por favor, anote la fecha en la que terminó de rellenar el cuestionario:

Día: \_\_\_\_

|  |  |  |
|--|--|--|
|  |  |  |
|--|--|--|

|  |  |  |  |
|--|--|--|--|
|  |  |  |  |
|--|--|--|--|

|  |  |  |  |  |
|--|--|--|--|--|
|  |  |  |  |  |
|--|--|--|--|--|

## CUESTIONARIO PARA VALORAR LA ADHERENCIA A LA DIETA MEDITERRÁNEA (niños)

|                                                                                                  |               |                          |
|--------------------------------------------------------------------------------------------------|---------------|--------------------------|
| 1. Toma una fruta o un zumo natural todos los días.                                              | Sí = 1 punto  | <input type="checkbox"/> |
| 2. Toma una 2ª pieza de fruta todos los días.                                                    | Sí = 1 punto  | <input type="checkbox"/> |
| 3. Toma verduras frescas (ensaladas) o cocinadas regularmente una vez al día.                    | Sí = 1 punto  | <input type="checkbox"/> |
| 4. Toma verduras frescas o cocinadas de forma regular más de una vez al día.                     | Sí = 1 punto  | <input type="checkbox"/> |
| 5. Consume pescado con regularidad (por lo menos 2-3 veces a la semana).                         | Sí = 1 punto  | <input type="checkbox"/> |
| 6. Acude una vez o más a la semana a un centro de comida rápida (fast food) tipo hamburguesería. | Sí = -1 punto | <input type="checkbox"/> |
| 7. Le gustan las legumbres y las toma más de 1 vez a la semana.                                  | Sí = 1 punto  | <input type="checkbox"/> |
| 8. Toma pasta o arroz casi a diario (5 días o más a la semana)                                   | Sí = 1 punto  | <input type="checkbox"/> |
| 9. Desayuna un cereal o derivado (pan, etc)                                                      | Sí = 1 punto  | <input type="checkbox"/> |
| 10. Toma frutos secos con regularidad (al menos 2-3 veces a la semana)                           | Sí = 1 punto  | <input type="checkbox"/> |
| 11. Se utiliza aceite de oliva en casa                                                           | Sí = 1 punto  | <input type="checkbox"/> |
| 12. Desayuna                                                                                     | Sí = -1 punto | <input type="checkbox"/> |
| 13. Desayuna un lácteo (yogurt, leche, etc).                                                     | Sí = 1 punto  | <input type="checkbox"/> |
| 14. Desayuna bollería industrial, galletas o pastelitos.                                         | Sí = 1 punto  | <input type="checkbox"/> |
| 15. Toma 2 yogures y/o 40 g queso cada día.                                                      | Sí = 1 punto  | <input type="checkbox"/> |
| 16. Toma golosinas y/o caramelos varias veces al día                                             | Sí = 1 punto  | <input type="checkbox"/> |

PUNTUACION TOTAL:

|  |  |
|--|--|
|  |  |
|--|--|

## CUESTIONARIO PARA VALORAR LA ADHERENCIA A LA DIETA MEDITERRANEA (adultos)

|                                                                                                                                                                                                             |                                                                |                          |
|-------------------------------------------------------------------------------------------------------------------------------------------------------------------------------------------------------------|----------------------------------------------------------------|--------------------------|
| 1. ¿Usa usted el aceite de oliva como principal grasa para cocinar?                                                                                                                                         | Sí= 1 punto                                                    | <input type="checkbox"/> |
| 2. ¿Cuánto aceite de oliva consume en total al día (incluyendo el usado para freír, comidas fuera de casa, ensaladas, etc.)?                                                                                | 4 o más cucharadas = 1 punto                                   | <input type="checkbox"/> |
| 3. ¿Cuántas raciones de verdura u hortalizas consume al día?<br>(las guarniciones o acompañamientos = 1/2 ración) 1 ración = 200g.                                                                          | 2 o más (al menos una de ellas en ensalada o crudas) = 1 punto | <input type="checkbox"/> |
| 4. ¿Cuántas piezas de fruta (incluyendo zumo natural) consume al día?                                                                                                                                       | 3 o más al día= 1 punto                                        | <input type="checkbox"/> |
| 5. ¿Cuántas raciones de carnes rojas, hamburguesas, salchichas o embutidos consume al día? (ración: 100 - 150 g)                                                                                            | Menos de 1 al día= 1 punto                                     | <input type="checkbox"/> |
| 6. ¿Cuántas raciones de mantequilla, margarina o nata consume al día? (porción individual: 12 g)                                                                                                            | Menos de 1 al día= 1 punto                                     | <input type="checkbox"/> |
| 7. ¿Cuántas bebidas carbonatadas y/o azucaradas (refrescos, colas, tónicas, bitter) consume al día?                                                                                                         | Menos de 1 al día= 1 punto                                     | <input type="checkbox"/> |
| 8. ¿Bebe usted vino? ¿Cuánto consume a la semana?                                                                                                                                                           | 7 o más vasos a la semana = 1                                  | <input type="checkbox"/> |
| 9. ¿Cuántas raciones de legumbres consume a la semana? (1 plato o ración de 150 g)                                                                                                                          | 3 o más a la semana= 1 punto                                   | <input type="checkbox"/> |
| 10. ¿Cuántas raciones de pescado-mariscos consume a la semana?<br>(1 plato pieza o ración: 100 - 150 de pescado o 4-5 piezas o 200 g de marisco)                                                            | 3 o más a la semana= 1 punto                                   | <input type="checkbox"/> |
| 11. ¿Cuántas veces consume repostería comercial (no casera) como galletas, flanes, dulce o pasteles a la semana?                                                                                            | Menos de 2 a la semana = 1 punto                               | <input type="checkbox"/> |
| 12. ¿Cuántas veces consume frutos secos a la semana? (ración 30 g)                                                                                                                                          | 3 o más a la semana= 1 punto                                   | <input type="checkbox"/> |
| 13. ¿Consume usted preferentemente carne de pollo, pavo o conejo en vez de ternera, cerdo, hamburguesas o salchichas? (carne de pollo: 1 pieza o ración de 100 - 150 g)                                     | Sí= 1 punto                                                    | <input type="checkbox"/> |
| 14. ¿Cuántas veces a la semana consume los vegetales cocinados, la pasta, arroz u otros platos aderezados con salsa de tomate, ajo, cebolla o puerro elaborada a fuego lento con aceite de oliva (sofrito)? | 2 o más a la semana= 1 punto                                   | <input type="checkbox"/> |

PUNTUACION TOTAL:

|  |  |
|--|--|
|  |  |
|--|--|

|  |  |
|--|--|
|  |  |
|--|--|

|  |  |  |
|--|--|--|
|  |  |  |
|--|--|--|

| Día | Mes | Año |
|-----|-----|-----|
|     |     |     |

## Cuestionario para padres/tutores

Queridos padres/tutores. Ustedes están participando....

### ¿Cómo rellenar este cuestionario?

En las siguientes secciones te preguntamos primero cosas sobre ti y luego sobre tu hijo/a.

- Por favor, rellena el cuestionario con un **bolígrafo azul o negro**.
- Marca con una X en la casilla de respuesta. Marca solo una respuesta por pregunta aunque haya respuesta múltiple. Esto se indicará en la misma pregunta.
- En algunas preguntas te pediremos que escribas tu respuesta.

### EJEMPLOS:

¿Qué distancia hay entre la guardería/colegio y tu casa?

- ☐<sub>1</sub> Hasta 500 metros
- ☐<sub>2</sub> Desde 500 metros a <1 kilómetro
- ☒<sub>3</sub> Desde 1 kilómetro a <2 kilómetros
- ☐<sub>4</sub> Desde 2 kilómetros a <3 kilómetros
- ☐<sub>5</sub> Desde 3 kilómetros a <4 kilómetros
- ☐<sub>6</sub> 4 kilómetros o más

¿Cuántas horas hace tu hijo/a deporte en un club deportivo a la semana?

|\_0\_|\_|2\_| horas    |\_3\_|\_|5\_| minutos

### Actividad física

En la siguiente sección del cuestionario te preguntaremos por tus hábitos de actividad física y de tu hijo/a.

Es importante recordar que no hay respuestas correctas o incorrectas. Contesta lo que se corresponda a tu situación.

En las siguientes preguntas, cuando decimos ACTIVIDAD FÍSICA, incluyendo el practicar un deporte o hacer ejercicio nos referimos a: Actividades que hacen al individuo respirar con más intensidad o sudar, por ejemplo, andar, ir en bicicleta, deportes de equipo como el fútbol y actividades organizadas como la natación.

### PREGUNTAS ACERCA DE PADRE / MADRE O TUTOR LEGAL

Piensa en el tiempo que estuviste andando los últimos 7 días. Esto incluye andar en el trabajo y en casa, andar cuando vas de un sitio a otro, y cualquier otra actividad que hayas hecho, aunque sea en el tiempo libre, deporte, ejercicio o diversión.

Durante **los últimos 7 días**, ¿cuántos días anduviste por lo menos 10 minutos seguidos?

Sí anduve |\_|\_| días a la semana

No anduve ningún día |\_|\_|

¿Cuánto tiempo anduviste uno de estos días?

|\_|\_|\_| horas al día y |\_|\_|\_| minutos al día

|  |  |
|--|--|
|  |  |
|--|--|

|  |  |  |
|--|--|--|
|  |  |  |
|--|--|--|

| Día | Mes | Año |
|-----|-----|-----|
|     |     |     |

Piensa en todas las actividades moderadas que tú realizaste en los últimos 7 días. Nos referimos a actividades que requieren esfuerzo físico moderado y que te hacen respirar de forma más intensa de lo normal. Piensa sólo en aquellas actividades físicas que hiciste por lo menos durante 10 minutos seguidos.

Durante los **últimos 7 días**, ¿Cuántos días realizaste actividad física **moderada** como llevar peso, ir en bicicleta a ritmo normal, o jugaste a tenis?

Sí  días a la semana

No hice actividad física moderada

¿Cuánto tiempo estuviste realizando actividad física moderada en uno de estos días?

horas al día y  minutos al día

Piensa en todas las actividades vigorosas que tú realizaste en los últimos 7 días. Nos referimos a actividades que requieren esfuerzo físico intenso y que te hacen respirar de forma mucho más intensa de lo normal. Piensa sólo en aquellas actividades que realizaste por lo menos durante 10 minutos seguidos.

Durante los **últimos 7 días**, ¿cuántos días realizaste actividad física **vigorosa** como levantar mucho peso, cavar en tierra, aeróbic, o ir en bicicleta rápido?

Sí  días a la semana

No hice actividad física intensa

¿Cuánto tiempo estuviste realizando actividad física intensa uno de estos días?

horas al día y  minutos al día

Piensa en el tiempo que estuviste sentado los días de semana durante los últimos 7 días. Incluye el tiempo en el trabajo, en casa y durante el tiempo de ocio. Esto quiere decir tiempo sentado en un escritorio, visitando amigos, leyendo o sentado o tumbado viendo la TV.

Durante los últimos 7 días, ¿cuánto tiempo estuviste sentado entre semana?

horas al día y  minutos al día

## PREGUNTAS ACERCA DE TU HIJO/A

En las siguientes preguntas, cuando decimos ACTIVIDAD FÍSICA, incluyendo el practicar un deporte o ejercicio, nos referimos a:

Actividades que realiza tu hijo/a antes o después del colegio y que le hacen respirar de forma más intensa de lo normal o sudar.

Ejemplos de actividad física son: andar, ir en bicicleta, jugar en el parque, deportes de equipo como fútbol y actividades organizadas como nadar o clases de baile



|  |  |
|--|--|
|  |  |
|--|--|

|  |  |  |
|--|--|--|
|  |  |  |
|--|--|--|

| Día | Mes | Año |
|-----|-----|-----|
|     |     |     |

¿Pertenece tu hijo/a a un club deportivo?

- ☐<sub>1</sub> Sí  
☐<sub>2</sub> No

¿Cuánto tiempo está tu hijo/a practicando deporte en el club deportivo a la semana?

|\_|\_| horas |\_|\_| minutos

¿Qué tipo de deporte practica tu hijo/a en el club deportivo?

Por favor, señala todas las que correspondan

- ☐<sub>1</sub> Fútbol  
☐<sub>2</sub> Artes marciales (por ejemplo, judo)  
☐<sub>3</sub> Natación  
☐<sub>4</sub> Gimnasia rítmica  
☐<sub>5</sub> Otras, por favor, especificar: \_\_\_\_\_

¿Cómo va tu hijo/a al colegio y cómo vuelve, y cuánto tiempo dura cada viaje?

|                                            | Viaje de ida | Tiempo (minutos) | Viaje de vuelta | Tiempo (minutos) |
|--------------------------------------------|--------------|------------------|-----------------|------------------|
| Andando                                    |              |                  |                 |                  |
| En bicicleta (por sí sólo)                 |              |                  |                 |                  |
| En bicicleta (llevado por tí)              |              |                  |                 |                  |
| En bus escolar y/o otro transporte público |              |                  |                 |                  |
| En coche/motocicleta                       |              |                  |                 |                  |
| Otro, por favor, especificar :             |              |                  |                 |                  |

## Actividades sedentarias

En la siguiente sección del cuestionario te preguntaremos por tus hábitos en actividades sedentarias y los de tu hijo/a. Es importante recordar que no hay respuestas correctas o incorrectas. Contesta lo que se corresponda a tu situación.

Cuando decimos actividades **SEDENTARIAS**, nos referimos a todas las actividades en las que estás sentado o tumbado, como ver la TV y/o DVD, utilizar el ordenador, dibujar o leer libros.

Respecto a las actividades frente a las pantallas, nos referimos al tiempo que inviertes en actividades como ver la TV/DVD/Video, juegos electrónicos y uso del ordenador con fines de ocio, etc.

## PREGUNTAS ACERCA DE PADRE / MADRE O TUTOR LEGAL

¿Cuántas horas al día ves tú habitualmente la TV (incluyendo DVD y videos) en tu tiempo libre? (por favor, marca una casilla para los días entre semana y una casilla para los días de fin de semana)

| Entre semana (media de los días)                              | Fines de semana (media de los días)                           |
|---------------------------------------------------------------|---------------------------------------------------------------|
| <input type="checkbox"/> <sub>1</sub> Nunca                   | <input type="checkbox"/> <sub>1</sub> Nunca                   |
| <input type="checkbox"/> <sub>2</sub> Menos de 30 minutos/día | <input type="checkbox"/> <sub>2</sub> Menos de 30 minutos/día |
| <input type="checkbox"/> <sub>3</sub> 30 minutos a <1 hr/día  | <input type="checkbox"/> <sub>3</sub> 30 minutos a <1 hr/día  |
| <input type="checkbox"/> <sub>4</sub> 1- 2 hrs/ día           | <input type="checkbox"/> <sub>4</sub> 1- 2 hrs/ día           |
| <input type="checkbox"/> <sub>5</sub> 3-4 hrs/ día            | <input type="checkbox"/> <sub>5</sub> 3-4 hrs/ día            |
| <input type="checkbox"/> <sub>6</sub> 5-6 hrs/ día            | <input type="checkbox"/> <sub>6</sub> 5-6 hrs/ día            |
| <input type="checkbox"/> <sub>7</sub> 7-8 hrs/ día            | <input type="checkbox"/> <sub>7</sub> 7-8 hrs/ día            |
| <input type="checkbox"/> <sub>8</sub> 8 hrs/ día              | <input type="checkbox"/> <sub>8</sub> 8 hrs/ día              |
| <input type="checkbox"/> <sub>9</sub> Más de 8 hrs/ día       | <input type="checkbox"/> <sub>9</sub> Más de 8 hrs/ día       |
| <input type="checkbox"/> <sub>10</sub> No lo sé               | <input type="checkbox"/> <sub>10</sub> No lo sé               |

| Días de la semana ( <b>media por noche</b> )           | Días de fin de semana ( <b>media por noche</b> )       |
|--------------------------------------------------------|--------------------------------------------------------|
| <input type="checkbox"/> <sub>1</sub> Menos de 6 horas | <input type="checkbox"/> <sub>1</sub> Menos de 6 horas |
| <input type="checkbox"/> <sub>2</sub> 6-7 horas        | <input type="checkbox"/> <sub>2</sub> 6-7 horas        |
| <input type="checkbox"/> <sub>3</sub> 8-9 horas        | <input type="checkbox"/> <sub>3</sub> 8-9 horas        |
| <input type="checkbox"/> <sub>4</sub> 10-11 horas      | <input type="checkbox"/> <sub>4</sub> 10-11 horas      |
| <input type="checkbox"/> <sub>5</sub> 12-13 horas      | <input type="checkbox"/> <sub>5</sub> 12-13 horas      |
| <input type="checkbox"/> <sub>6</sub> 14 horas         | <input type="checkbox"/> <sub>6</sub> 14 horas         |
| <input type="checkbox"/> <sub>7</sub> Más de 14 horas  | <input type="checkbox"/> <sub>7</sub> Más de 14 horas  |
| <input type="checkbox"/> <sub>8</sub> No lo sé         | <input type="checkbox"/> <sub>8</sub> No lo sé         |

|  |  |
|--|--|
|  |  |
|--|--|

|  |  |  |
|--|--|--|
|  |  |  |
|--|--|--|

| Día | Mes | Año |
|-----|-----|-----|
|     |     |     |

## PREGUNTAS ACERCA DE TU HIJO/A

Cuando decimos **actividades SEDENTARIAS**, nos referimos a todas las actividades en las que estás sentado o tumbado, como ver la TV y/o DVD, utilizar el ordenador, dibujar o leer libros. Respecto a las actividades frente a las pantallas, nos referimos al tiempo que inviertes en actividades como ver la TV/DVD/Video, juegos electrónicos y uso del ordenador con fines de ocio, etc.

¿Cuántas horas al día **VE TU HIJO/A** habitualmente la TV (incluyendo DVD y videos) in Su tiempo libre? (por favor, marca una casilla para los días entre semana y una casilla para los días de fin de semana)

| Entre semana (media de los días)                   | Fines de semana (media de los días)                |
|----------------------------------------------------|----------------------------------------------------|
| <input type="checkbox"/> 1 Nunca                   | <input type="checkbox"/> 1 Nunca                   |
| <input type="checkbox"/> 2 Menos de 30 minutos/día | <input type="checkbox"/> 2 Menos de 30 minutos/día |
| <input type="checkbox"/> 3 30 minutos a <1 hr/día  | <input type="checkbox"/> 3 30 minutos a <1 hr/día  |
| <input type="checkbox"/> 4 1- 2 hrs/ día           | <input type="checkbox"/> 4 1- 2 hrs/ día           |
| <input type="checkbox"/> 5 3-4 hrs/ día            | <input type="checkbox"/> 5 3-4 hrs/ día            |
| <input type="checkbox"/> 6 5-6 hrs/ día            | <input type="checkbox"/> 6 5-6 hrs/ día            |
| <input type="checkbox"/> 7 7-8 hrs/ día            | <input type="checkbox"/> 7 7-8 hrs/ día            |
| <input type="checkbox"/> 8 8 hrs/ día              | <input type="checkbox"/> 8 8 hrs/ día              |
| <input type="checkbox"/> 9 Más de 8 hrs/ día       | <input type="checkbox"/> 9 Más de 8 hrs/ día       |
| <input type="checkbox"/> 10 No lo sé               | <input type="checkbox"/> 10 No lo sé               |

¿Cuántas horas al día está tu hijo/a habitualmente utilizando el ordenador para jugar, también con consolas (por ejemplo, Playstation, Xbox, GameCube) durante su tiempo de ocio?

| Entre semana (media de los días)                   | Fines de semana (media de los días)                |
|----------------------------------------------------|----------------------------------------------------|
| <input type="checkbox"/> 1 Nunca                   | <input type="checkbox"/> 1 Nunca                   |
| <input type="checkbox"/> 2 Menos de 30 minutos/día | <input type="checkbox"/> 2 Menos de 30 minutos/día |
| <input type="checkbox"/> 3 30 minutos a <1 hr/día  | <input type="checkbox"/> 3 30 minutos a <1 hr/día  |
| <input type="checkbox"/> 4 1- 2 hrs/ día           | <input type="checkbox"/> 4 1- 2 hrs/ día           |
| <input type="checkbox"/> 5 3-4 hrs/ día            | <input type="checkbox"/> 5 3-4 hrs/ día            |
| <input type="checkbox"/> 6 5-6 hrs/ día            | <input type="checkbox"/> 6 5-6 hrs/ día            |
| <input type="checkbox"/> 7 7-8 hrs/ día            | <input type="checkbox"/> 7 7-8 hrs/ día            |
| <input type="checkbox"/> 8 8 hrs/ día              | <input type="checkbox"/> 8 8 hrs/ día              |
| <input type="checkbox"/> 9 Más de 8 hrs/ día       | <input type="checkbox"/> 9 Más de 8 hrs/ día       |
| <input type="checkbox"/> 10 No lo sé               | <input type="checkbox"/> 10 No lo sé               |

¿Cuántas horas al día juega tu hijo/a de manera pasiva (mirando, leyendo libros, jugando con muñecas, a coches, pintando, construcción) durante su tiempo de ocio?

| Entre semana (media de los días)                   | Fines de semana (media de los días)                |
|----------------------------------------------------|----------------------------------------------------|
| <input type="checkbox"/> 1 Nunca                   | <input type="checkbox"/> 1 Nunca                   |
| <input type="checkbox"/> 2 Menos de 30 minutos/día | <input type="checkbox"/> 2 Menos de 30 minutos/día |
| <input type="checkbox"/> 3 30 minutos a <1 hr/día  | <input type="checkbox"/> 3 30 minutos a <1 hr/día  |
| <input type="checkbox"/> 4 1- 2 hrs/ día           | <input type="checkbox"/> 4 1- 2 hrs/ día           |
| <input type="checkbox"/> 5 3-4 hrs/ día            | <input type="checkbox"/> 5 3-4 hrs/ día            |
| <input type="checkbox"/> 6 5-6 hrs/ día            | <input type="checkbox"/> 6 5-6 hrs/ día            |

|  |  |  |  |  |  |  |  |  |  |  |  |  |  |  |  |
|--|--|--|--|--|--|--|--|--|--|--|--|--|--|--|--|
|  |  |  |  |  |  |  |  |  |  |  |  |  |  |  |  |
|--|--|--|--|--|--|--|--|--|--|--|--|--|--|--|--|

|                                              |                                              |
|----------------------------------------------|----------------------------------------------|
| <input type="checkbox"/> 7-8 hrs/ día        | <input type="checkbox"/> 7-8 hrs/ día        |
| <input type="checkbox"/> 8 hrs/ día          | <input type="checkbox"/> 8 hrs/ día          |
| <input type="checkbox"/> 9 Más de 8 hrs/ día | <input type="checkbox"/> 9 Más de 8 hrs/ día |
| <input type="checkbox"/> 10 No lo sé         | <input type="checkbox"/> 10 No lo sé         |

¿Cuántas horas duerme habitualmente por la noche tu hijo/a? (por favor, marca una casilla para los días entre semana y otra casilla para los días de fin de semana)

| Días de la semana (media por noche)         | Días de fin de semana (media por noche)     |
|---------------------------------------------|---------------------------------------------|
| <input type="checkbox"/> 1 Menos de 6 horas | <input type="checkbox"/> 1 Menos de 6 horas |
| <input type="checkbox"/> 2 6-7 horas        | <input type="checkbox"/> 2 6-7 horas        |
| <input type="checkbox"/> 3 8-9 horas        | <input type="checkbox"/> 3 8-9 horas        |
| <input type="checkbox"/> 4 10-11 horas      | <input type="checkbox"/> 4 10-11 horas      |
| <input type="checkbox"/> 5 12-13 horas      | <input type="checkbox"/> 5 12-13 horas      |
| <input type="checkbox"/> 6 14 horas         | <input type="checkbox"/> 6 14 horas         |
| <input type="checkbox"/> 7 Más de 14 horas  | <input type="checkbox"/> 7 Más de 14 horas  |
| <input type="checkbox"/> 8 No lo sé         | <input type="checkbox"/> 8 No lo sé         |

Pensando en el número de veces y duración de las siestas que tu hijo/a habitualmente hace; por favor, indica el TIEMPO TOTAL DEL DÍA HACIENDO SIESTAS (por favor, marca una casilla para los días entre semana y otra casilla para los días de fin de semana)

| Días de la semana (media por día de la semana)                            | Días de fin de semana (media por día de fin de semana)                        |
|---------------------------------------------------------------------------|-------------------------------------------------------------------------------|
| <input type="checkbox"/> 1 Mi hijo/a no hace siesta los días de la semana | <input type="checkbox"/> 1 Mi hijo/a no hace siesta los días de fin de semana |
| <input type="checkbox"/> 2 Menos de 1 hora                                | <input type="checkbox"/> 2 Menos de 1 hora                                    |
| <input type="checkbox"/> 3 1-2 horas                                      | <input type="checkbox"/> 3 1-2 horas                                          |
| <input type="checkbox"/> 4 3-4 horas                                      | <input type="checkbox"/> 4 3-4 horas                                          |
| <input type="checkbox"/> 5 5-6 horas                                      | <input type="checkbox"/> 5 5-6 horas                                          |
| <input type="checkbox"/> 6 7-8 horas                                      | <input type="checkbox"/> 6 7-8 horas                                          |
| <input type="checkbox"/> 7 9 o más horas                                  | <input type="checkbox"/> 7 9 o más horas                                      |
| <input type="checkbox"/> 8 No lo sé                                       | <input type="checkbox"/> 8 No lo sé                                           |

**¡MUCHAS GRACIAS POR RELLENAR ESTE CUESTIONARIO!**

# Alimentando el Cambio

Centro

Participante

Fecha actual

Día

Mes

Año

## CUESTIONARIO GENERAL

### Instrucciones

El cuestionario contiene respuestas y afirmaciones que deben de ser marcadas con una cruz. Por favor, marque solamente una opción, a no ser que se indique lo contrario

Si se le pide escribir, utilice la línea que aparece para contestar

Para preguntas referentes a cantidades o fechas, utilice las casillas que aquí se indican

Sáltese una pregunta solamente si aparece lo siguiente: “→ → → Por favor, continuar en ...”

Si quisiera corregir alguna de las respuestas, por favor, tache la respuesta incorrecta y escriba la correcta algo más arriba / al lado

Si quisiera corregir una respuesta marcada con una cruz, por favor, tache completamente la respuesta y marque la deseada

### Información General

#### 1. ¿Cuál es su relación con el niño/a seleccionado/a?

☐ Padre/madre biológico/a ☐ Padre/madre adoptivo/a ☐ Padrastro o madrastra

☐ Padre/madre en un hogar de acogida ☐ Otro, por favor especifique: \_\_\_\_\_

#### 2. Usted es: ☐ Varón ☐ Mujer

3. ¿Cuál es fecha de nacimiento de su hijo/a? (dd/mm/aaaa)  /  /

#### 4. ¿Cuál es la fecha de nacimiento, altura y peso de los padres con los que vive el/la niño/a?

|              | MADRE                                                                                                                                                                       |              | PADRE                                                                                                                                                                       |
|--------------|-----------------------------------------------------------------------------------------------------------------------------------------------------------------------------|--------------|-----------------------------------------------------------------------------------------------------------------------------------------------------------------------------|
| (dd/mm/aaaa) | <input type="text"/> <input type="text"/> / <input type="text"/> <input type="text"/> / <input type="text"/> <input type="text"/> <input type="text"/> <input type="text"/> | (dd/mm/aaaa) | <input type="text"/> <input type="text"/> / <input type="text"/> <input type="text"/> / <input type="text"/> <input type="text"/> <input type="text"/> <input type="text"/> |
| Altura (cm)  | <input type="text"/> <input type="text"/> <input type="text"/> , <input type="text"/> <input type="text"/>                                                                  | Altura (cm)  | <input type="text"/> <input type="text"/> <input type="text"/> , <input type="text"/> <input type="text"/>                                                                  |
| Peso (kg)    | <input type="text"/> <input type="text"/> <input type="text"/> , <input type="text"/> <input type="text"/>                                                                  | Peso (kg)    | <input type="text"/> <input type="text"/> <input type="text"/> , <input type="text"/> <input type="text"/>                                                                  |

#### 5. ¿Con quién vive el niño/a la mayor parte del tiempo? Por favor, marque la respuesta que corresponda.

☐ Con sus padres

☐ Con su madre

☐ Con su madre y su nueva pareja

☐ Con su padre

☐ Con su padre y su nueva pareja

☐ La mitad del tiempo con su madre y la otra mitad con su padre ☐ Con sus abuelos u otros familiares

☐ Con padres de acogida o padres adoptivos ☐ En una institución, Ej. Orfanato ☐ Otro lugar, especificar: \_\_\_\_\_

#### 6. ¿Cuántas personas viven de forma permanente en el hogar donde el niño/a habitualmente reside?

Número de personas (adultos y niños):  Número de personas menores a 18 años:

### Información acerca de su hijo/a

#### 7. ¿Ha sido diagnosticado su hijo/a alguna vez de alguna de las siguientes enfermedades?

En caso afirmativo, indicar si la enfermedad sigue presente y la edad de aparición/primer diagnóstico

|                                                                                        | ¿Todavía presenta la enfermedad?                        | ¿A qué edad fue diagnosticada?                 |
|----------------------------------------------------------------------------------------|---------------------------------------------------------|------------------------------------------------|
| <input type="checkbox"/> Alergias                                                      | <input type="checkbox"/> Sí <input type="checkbox"/> No | <input type="text"/> <input type="text"/> años |
| <input type="checkbox"/> Asma                                                          | <input type="checkbox"/> Sí <input type="checkbox"/> No | <input type="text"/> <input type="text"/> años |
| <input type="checkbox"/> Problemas ortopédicos crónicos, de huesos o de articulaciones | <input type="checkbox"/> Sí <input type="checkbox"/> No | <input type="text"/> <input type="text"/> años |
| <input type="checkbox"/> Enfermedad reumática crónica                                  | <input type="checkbox"/> Sí <input type="checkbox"/> No | <input type="text"/> <input type="text"/> años |
| <input type="checkbox"/> Problemas dermatológicos importantes                          | <input type="checkbox"/> Sí <input type="checkbox"/> No | <input type="text"/> <input type="text"/> años |
| <input type="checkbox"/> Anemia                                                        | <input type="checkbox"/> Sí <input type="checkbox"/> No | <input type="text"/> <input type="text"/> años |
| <input type="checkbox"/> Diabetes mellitus                                             | <input type="checkbox"/> Sí <input type="checkbox"/> No | <input type="text"/> <input type="text"/> años |
| <input type="checkbox"/> Síndrome metabólico                                           | <input type="checkbox"/> Sí <input type="checkbox"/> No | <input type="text"/> <input type="text"/> años |
| <input type="checkbox"/> Obesidad                                                      | <input type="checkbox"/> Sí <input type="checkbox"/> No | <input type="text"/> <input type="text"/> años |

# Alimentando el Cambio

Centro

Participante

Fecha actual

|  |  |
|--|--|
|  |  |
|--|--|

|  |  |  |
|--|--|--|
|  |  |  |
|--|--|--|

| Día | Mes | Año |
|-----|-----|-----|
|     |     |     |

☐ Enfermedades musculoesqueléticas

☐ Sí ☐ No

años

☐ Trastorno por Déficit de Atención con Hiperactividad (TDAH)

☐ Sí ☐ No

años

☐ Problemas de crecimiento o de peso corporal.

☐ Sí ☐ No

años

Por favor, especificar: \_\_\_\_\_

☐ Otras, por favor, especificar: \_\_\_\_\_

☐ Sí ☐ No

años

## Hábito de desayuno de su hijo/a

### 8. En una semana normal, ¿con que frecuencia desayuna su hijo/a?

☐ Nunca ☐ Algunos días (1-3 días) ☐ La mayoría de los días (4-6 días) ☐ Todos los días ☐ Sólo el fin de semana

### 9. ¿Qué desayuna habitualmente su hijo/a?

- |                                                       |                                                             |                                                 |
|-------------------------------------------------------|-------------------------------------------------------------|-------------------------------------------------|
| <input type="checkbox"/> Nada no suele desayunar      | <input type="checkbox"/> Café, chocolate, cacao             | <input type="checkbox"/> Bollería               |
| <input type="checkbox"/> Leche                        | <input type="checkbox"/> Pan, tostadas                      | <input type="checkbox"/> Fruta Fresca           |
| <input type="checkbox"/> Batidos Lácteos              | <input type="checkbox"/> Galletas                           | <input type="checkbox"/> Zumo natural exprimido |
| <input type="checkbox"/> Yogur, queso u otros lácteos | <input type="checkbox"/> Cereales de desayuno azucarados    | <input type="checkbox"/> Zumo envasado          |
|                                                       | <input type="checkbox"/> Cereales de desayuno no azucarados | <input type="checkbox"/> Otros alimentos        |

## Estilo de vida familiar, salud y bienestar de su hijo/a

### 10. En caso de necesidad real, ¿con cuántas personas (incluyendo a su familia) realmente puede contar usted?

☐ Nadie ☐ 1 persona ☐ 2 ó 3 personas ☐ Más de 3 personas

### 24. Bienestar emocional. Durante la última semana, mi hijo/a...

|                                              |                                      |                                     |                                  |                                   |                                         |
|----------------------------------------------|--------------------------------------|-------------------------------------|----------------------------------|-----------------------------------|-----------------------------------------|
| ... se estuvo riendo y se divirtió mucho.    | <input type="checkbox"/> No del todo | <input type="checkbox"/> Casi nunca | <input type="checkbox"/> A veces | <input type="checkbox"/> A menudo | <input type="checkbox"/> Todo el tiempo |
| ... no se sintió bien para hacer nada        | <input type="checkbox"/> No del todo | <input type="checkbox"/> Casi nunca | <input type="checkbox"/> A veces | <input type="checkbox"/> A menudo | <input type="checkbox"/> Todo el tiempo |
| ... se sintió solo/a.                        | <input type="checkbox"/> No del todo | <input type="checkbox"/> Casi nunca | <input type="checkbox"/> A veces | <input type="checkbox"/> A menudo | <input type="checkbox"/> Todo el tiempo |
| ... se sintió inseguro/a y estaba ansioso/a. | <input type="checkbox"/> No del todo | <input type="checkbox"/> Casi nunca | <input type="checkbox"/> A veces | <input type="checkbox"/> A menudo | <input type="checkbox"/> Todo el tiempo |

### 25. Autoestima. Durante la última semana, mi hijo/a...

|                                       |                                      |                                     |                                  |                                   |                                         |
|---------------------------------------|--------------------------------------|-------------------------------------|----------------------------------|-----------------------------------|-----------------------------------------|
| ... estuvo orgulloso/a de sí mismo/a. | <input type="checkbox"/> No del todo | <input type="checkbox"/> Casi nunca | <input type="checkbox"/> A veces | <input type="checkbox"/> A menudo | <input type="checkbox"/> Todo el tiempo |
| ... se sintió en la cima del mundo    | <input type="checkbox"/> No del todo | <input type="checkbox"/> Casi nunca | <input type="checkbox"/> A veces | <input type="checkbox"/> A menudo | <input type="checkbox"/> Todo el tiempo |
| ... se sintió bien consigo mismo/a.   | <input type="checkbox"/> No del todo | <input type="checkbox"/> Casi nunca | <input type="checkbox"/> A veces | <input type="checkbox"/> A menudo | <input type="checkbox"/> Todo el tiempo |
| ... tuvo buenas ideas.                | <input type="checkbox"/> No del todo | <input type="checkbox"/> Casi nunca | <input type="checkbox"/> A veces | <input type="checkbox"/> A menudo | <input type="checkbox"/> Todo el tiempo |

### 26. Familia. Durante la última semana, mi hijo/a...

|                                                 |                                      |                                     |                                  |                                   |                                         |
|-------------------------------------------------|--------------------------------------|-------------------------------------|----------------------------------|-----------------------------------|-----------------------------------------|
| ... se sintió a gusto con nosotros como padres. | <input type="checkbox"/> No del todo | <input type="checkbox"/> Casi nunca | <input type="checkbox"/> A veces | <input type="checkbox"/> A menudo | <input type="checkbox"/> Todo el tiempo |
| ... estuvo a gusto en casa.                     | <input type="checkbox"/> No del todo | <input type="checkbox"/> Casi nunca | <input type="checkbox"/> A veces | <input type="checkbox"/> A menudo | <input type="checkbox"/> Todo el tiempo |
| ... discutimos en casa.                         | <input type="checkbox"/> No del todo | <input type="checkbox"/> Casi nunca | <input type="checkbox"/> A veces | <input type="checkbox"/> A menudo | <input type="checkbox"/> Todo el tiempo |
| ... se sintió sobreprotegido/a por nosotros.    | <input type="checkbox"/> No del todo | <input type="checkbox"/> Casi nunca | <input type="checkbox"/> A veces | <input type="checkbox"/> A menudo | <input type="checkbox"/> Todo el tiempo |

# Alimentando el Cambio

Centro

Participante

Fecha actual

Día

Mes

Año

|  |  |
|--|--|
|  |  |
|--|--|

|  |  |  |
|--|--|--|
|  |  |  |
|--|--|--|

|  |  |  |  |  |
|--|--|--|--|--|
|  |  |  |  |  |
|--|--|--|--|--|

## Información socio-demográfica de la familia

11. ¿Tiene su hijo/a su propia habitación?

☐ Sí

☐ No

12. ¿Cuántos coches tiene su familia?

☐ No disponemos de coche

☐ 1 coche

☐ 2 coches

☐ 3 o más coches

13. ¿Cuántos ordenadores tiene su familia?

☐ No disponemos de ordenador

☐ 1 ordenador

☐ 2 ordenadores

☐ 3 o más ordenadores

14. ¿Tiene conexión a internet en su casa?

☐ Sí

☐ No

15. ¿Nació su hijo/a en España?

☐ Sí

☐ No, por favor especificar: \_\_\_\_\_

16. ¿Nació la madre del niño/a en España?

☐ Sí

☐ No, por favor especificar: \_\_\_\_\_

17. ¿Nació el padre del niño/a en España?

☐ Sí

☐ No, por favor especificar: \_\_\_\_\_

18. ¿En qué lengua habla normalmente en casa con su hijo/a?

☐ Castellano, catalán, valenciano, euskera, gallego.

☐ Otro idioma, por favor especifique: \_\_\_\_\_

19. ¿Cuál es el nivel más alto de educación escolar de los padres del niño/a?

Por favor, marcar solamente uno por persona.

**Madre**

**Padre**

Primaria /EGB

☐ 1

☐ 1

Secundaria /ESO

☐ 2

☐ 2

Formación profesional

☐ 3

☐ 3

Ciclos formativos de grado superior

☐ 4

☐ 4

Bachillerato/ BUP/COU

☐ 5

☐ 5

Sin graduación (todavía)

☐ 6

☐ 6

Otros/desconocido

☐ 7

☐ 7

20. ¿Cuál es el nivel más alto de cualificación profesional que tienen los padres?

Por favor, marcar solamente uno por persona.

**Madre**

**Padre**

Formación profesional

☐ 1

☐ 1

Ciclos formativos de grado superior

☐ 2

☐ 2

Diplomatura universitaria/ingeniería técnica

☐ 3

☐ 3

Licenciatura/ graduado /ingeniería superior

☐ 4

☐ 4

Doctorado

☐ 5

☐ 5

No formado (todavía)

☐ 6

☐ 6

Desconocido/otros

☐ 7

☐ 7

21. ¿Cuál de los siguientes enunciados describe mejor el estado ocupacional actual de los padres del niño/a?

Por favor, marcar solamente uno por persona.

**Madre**

**Padre**

Trabajo a tiempo completo (30 horas o más a la semana)

☐ 1

☐ 1

Trabajo a tiempo parcial (menos de 30 horas a la semana)

☐ 2

☐ 2

Estudio o voy a la universidad

☐ 3

☐ 3

No tengo trabajo remunerado (ej. labores del hogar)

☐ 4

☐ 4

Retirado (también jubilación anticipada)

☐ 5

☐ 5

Baja temporal de la empresa (ej. baja por maternidad o paternidad)

☐ 6

☐ 6

Desempleado en la actualidad, recibiendo el paro

☐ 7

☐ 7

Desempleado en la actualidad, sin recibir el paro

☐ 8

☐ 8

En asistencia pública (asistencia social)

☐ 9

☐ 9

Otro, por favor especifique: \_\_\_\_\_

☐ 10

☐ 10

# Alimentando el Cambio

| Centro |  | Participante |  |  | Fecha actual |     |  |     |  |
|--------|--|--------------|--|--|--------------|-----|--|-----|--|
|        |  |              |  |  | Día          | Mes |  | Año |  |
|        |  |              |  |  |              |     |  |     |  |

## 22. ¿En qué posición laboral están actualmente ocupados los padres del niño/a?

Si usted o su cónyuge/pareja ya no están ocupados o actualmente no están ocupados, por favor, indique la última posición laboral.

|                                                                                                  | Madre                    | Padre                    |
|--------------------------------------------------------------------------------------------------|--------------------------|--------------------------|
| <b>Obrero</b>                                                                                    |                          |                          |
| Obrero no cualificado                                                                            | <input type="radio"/> _1 | <input type="radio"/> _1 |
| Obrero semi-cualificado                                                                          | <input type="radio"/> _2 | <input type="radio"/> _2 |
| Obrero cualificado, artesano                                                                     | <input type="radio"/> _3 | <input type="radio"/> _3 |
| Maestro artesano, capataz                                                                        | <input type="radio"/> _4 | <input type="radio"/> _4 |
| <b>Patrón o autónomo (incluyendo la ayuda de miembros de la familia)</b>                         |                          |                          |
| Agricultor y/o ganadero autónomo                                                                 | <input type="radio"/> _1 | <input type="radio"/> _1 |
| Autónomo, trabajador por cuenta propia                                                           | <input type="radio"/> _2 | <input type="radio"/> _2 |
| Patrón con hasta 9 empleados                                                                     | <input type="radio"/> _3 | <input type="radio"/> _3 |
| Patrón con 10 o más empleados                                                                    | <input type="radio"/> _4 | <input type="radio"/> _4 |
| Ayudo a algún miembro de la familia                                                              | <input type="radio"/> _5 | <input type="radio"/> _5 |
| <b>Empleado</b>                                                                                  |                          |                          |
| Empleado (ej. dependiente, recepcionista, oficinista)                                            | <input type="radio"/> _1 | <input type="radio"/> _1 |
| Empleado cualificado (ej. auxiliar contable, auxiliar dental)                                    | <input type="radio"/> _2 | <input type="radio"/> _2 |
| Empleado altamente cualificado o con funciones de gestión (ej. científico, jefe de departamento) | <input type="radio"/> _3 | <input type="radio"/> _3 |
| Empleado con extensas funciones ejecutivas (ej. director, director general, junta directiva)     | <input type="radio"/> _4 | <input type="radio"/> _4 |
| <b>Funcionario público</b>                                                                       |                          |                          |
| Categoría A                                                                                      | <input type="radio"/> _1 | <input type="radio"/> _1 |
| Categoría B                                                                                      | <input type="radio"/> _2 | <input type="radio"/> _2 |
| Categoría C                                                                                      | <input type="radio"/> _3 | <input type="radio"/> _3 |
| Categoría D                                                                                      | <input type="radio"/> _4 | <input type="radio"/> _4 |
| Categoría E                                                                                      | <input type="radio"/> _5 | <input type="radio"/> _5 |
| <b>No trabajo</b>                                                                                | <input type="radio"/> _6 | <input type="radio"/> _6 |

¡Gracias por contestar a las preguntas!

Por favor, compruebe una vez más que ha rellenado el cuestionario en su totalidad.

Por favor, anote la fecha en la que terminó de rellenar el cuestionario: |\_\_|\_\_| Día |\_\_|\_\_| Mes |\_\_|\_\_|\_\_|\_\_| Año
